# Supplementary material for: Indirect Health Effects of COVID-19: Unhealthy Lifestyle Behaviors during the Lockdown in the United Arab Emirates
Source: PubMed Central journal article supplement (PMC7922937; doi:10.3390/ijerph18041964), 2021-02-18
Supplement: ijerph-18-01964-s001.pdf [file ijerph-18-01964-s001.pdf]

## **Nutrition and Lifestyle Changes During COVID 19 Lockdown in the UAE**

Introduction

Dear Sir/Madam

It is our pleasure to invite you to participate in this online study. Your help in responding to this survey will help us learn more about changes in your dietary and lifestyle habits during the Corona lockdown which will help us in understanding the influence of the corona pandemic on the Nutritional Status of the population This study is conducted by Health Promotion in the Supreme Council for Family Affairs in Sharjah with the collaboration of the University of Sharjah. We appreciate your time and assure you confidentiality. The data will be kept strictly confidential and for scientific research purposes only. Your participation in this study is completely voluntary. You have the right to refuse or do not complete the questionnaire at any time and for any reason without any penalty or consequences. The survey should take approximately 10 min to complete.

If you have any questions regarding this study, please call or write to principal investigators Mrs Mahra A Kitbi from Health Promotion in the Supreme Council for Family Affairs in Sharjah (mahra@scfa.shj.ae telephone: 0506333089 and Dr. Hadia Radwan from the University of Sharjah (hradwan@sharjah.ac.ae) telephone: 065057549.

If you have concerns or complaints about this study, please write to the University of Sharjah Research Ethics Committee at rec@sharjah.ac.ae

Thank you for your interest in participating.

I have read all the information and agree to participate

\*

/Agree

### **Your Health and Physical Activity**

1. Quarantine is a good way to protect my family and to stop the spread of infectious disease outbreaks. \*

Agree

Disagree

2. Are you living in: \*

An apartment/house with no garden

A house with a garden or yard

3. Are you working? \*

Yes

No

4. If yes, are you working from home?

Yes

No

5. Since lock down, did your physical activity \_\_\_\_? \*

Increase  
Decrease  
Same

### **Dietary**

6. Since lock down, did your food intake\_\_\_\_\_? \*

Increase  
Decrease  
Same

7. Which food items do you consume the most during COVID-19 pandemic? (select all that applies)

\*

Fruits  
Vegetables  
Home Cooked food  
Delivery food  
Fried foods  
Cakes and pastries  
Chips and crackers  
Fast food  
Nuts  
Sweets  
Herbal Tea  
None

8. What type of food you are consuming more \*

Salty Snacks: chips, popcorn, crackers, etc  
Sweet snacks: Cupcakes, cookies, cakes, etc  
Cooked food  
Nothing  
Other

### **Lifestyle**

9. Did your smoking during the COVID-19 pandemic -----? \*

Decrease  
Increase  
It did not change  
I am not a smoker

10. In general, how many times you used to go grocery shopping per week before COVID-19 lockdown? \*

1 time/week  
2 times/week  
3 times or more/week  
No definite time

11. In general, how many times you used to go grocery shopping per week during COVID-19 lockdown? \*

- 1 time/week
- 2 times/week
- 3 times or more/week
- No definite time

12. When you are going out, do you wear? \*

- Gloves
- Mask
- Both
- None

13. How do you disinfect purchased fruits and vegetables? \*

- Water
- Water + vinegar
- Water + salt
- Water + vinegar + salt
- Water + Detergents (Dishwashing liquid)
- Disinfectants for vegetables and fruits
- None

14. Do you order food or groceries for delivery? \*

- Yes
- No

15. Do you sterilize the food items when delivered? \*

- Yes
- No

16. Did your hours of sleep at night -----during lockdown?

- Increase
- Decrease
- Same

17. Do you feel angry nowadays more than before? \*

- Yes
- No

18. Are you feeling more stressed now during lockdown? \*

- Yes
- No

19. Mainly, what do you do to relieve your stress? \*

- Eat more
- Meditate
- Pray
- Watch movies/listen to music/social media
- Exercise more
- Others: \_\_\_\_\_

20. Do you think after lockdown your lifestyle will.....? \*

- Improve
- Don't know if it will change
- Stays the same

**Information About You**

21. Age \*: \_\_\_\_\_

22. Gender \*

- Male
- Female

23. Marital status \*

- Married
- Single
- Divorced
- Widowed

24. What is your Nationality?

- Emirati
- Arabic
- Western
- Asian
- Other: \_\_\_\_\_

25. Education \*

- High school diploma or less
- University degree

26. Residence at----- \*

- Sharjah
- Dubai
- Ajman
- UAQ
- RAK
- Fujairah
- AbuDhabi

27. How many Children you have? \_\_\_\_\_

28. Did your weight \_\_\_\_\_ during lockdown? \*

- Increase
- Decrease
- Did not change

29. Your Weight(cm): \*

30. Your Height(kg): \*

..... Thank You
